# Supplementary material for: Simple CsI doping outperforms complex organic additives in carbon-based perovskite solar cells
Source: Royal Society of Chemistry journal article supplement (doi:10.1039/d6na00481d), 2026-06-16
Supplement: d6na00481d1.pdf [file d6na00481d1.pdf]

## Supporting information

### **Simple CsI Doping Outperforms Complex Organic Additives in Carbon– Based Perovskite Solar Cells**

Zhe Tang<sup>1,2</sup>, Jiawei Zhao<sup>2,3</sup>, Heng Liu<sup>1,4,\*</sup>, Baoting Huang<sup>2</sup>, Fengling Hang<sup>2</sup>, Nian Cheng<sup>5</sup>,

Zhen–guo Liu<sup>1,2,3\*</sup>, Peng–an Zong<sup>1,2,\*</sup>

<sup>1</sup> College of Materials Science and Engineering, Nanjing Tech University, Nanjing 211800,  
China

<sup>2</sup> Key Laboratory of Flexible Electronics of Zhejiang Province, Ningbo Institute of  
Northwestern Polytechnical University, Ningbo 315103, China

<sup>3</sup> Frontiers Science Center for Flexible Electronics (FSCFE), Institute of Flexible  
Electronics (IFE), Northwestern Polytechnical University, Xian 710072, China

<sup>4</sup> Advanced Institute for Materials Research (WPI-AIMR), Tohoku University, Senda,  
Japan

<sup>5</sup> School of Physics and Optoelectronic Engineering, Yangtze University, Jingzhou 434023,  
China

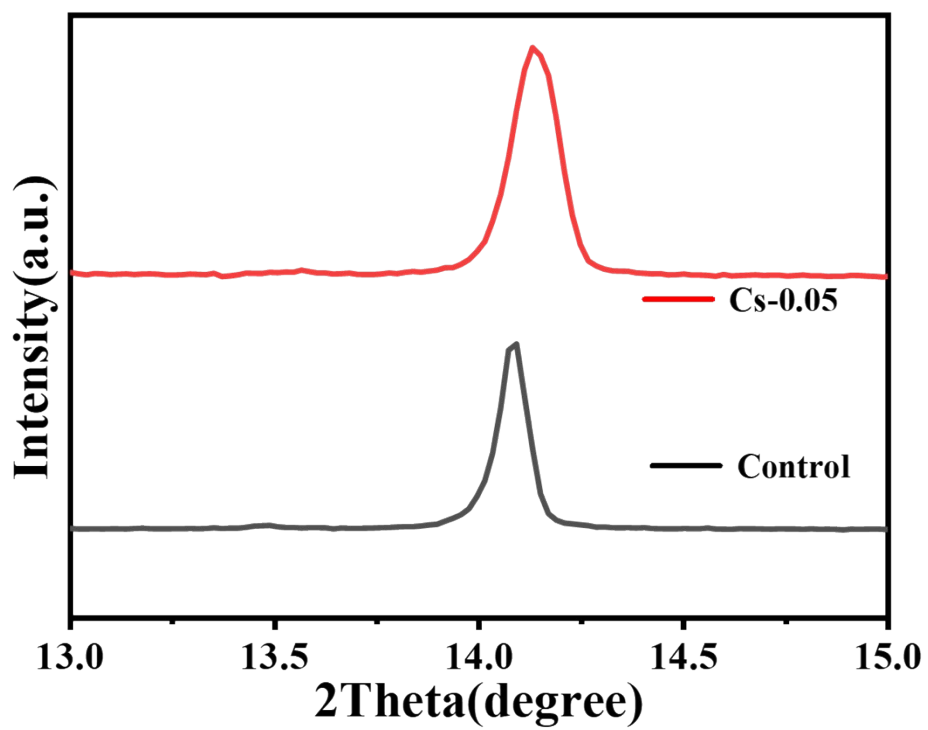

**Fig. S1** Local magnification of XRD of perovskite films with different concentrations of CsI additives: Control, Cs-0.05.

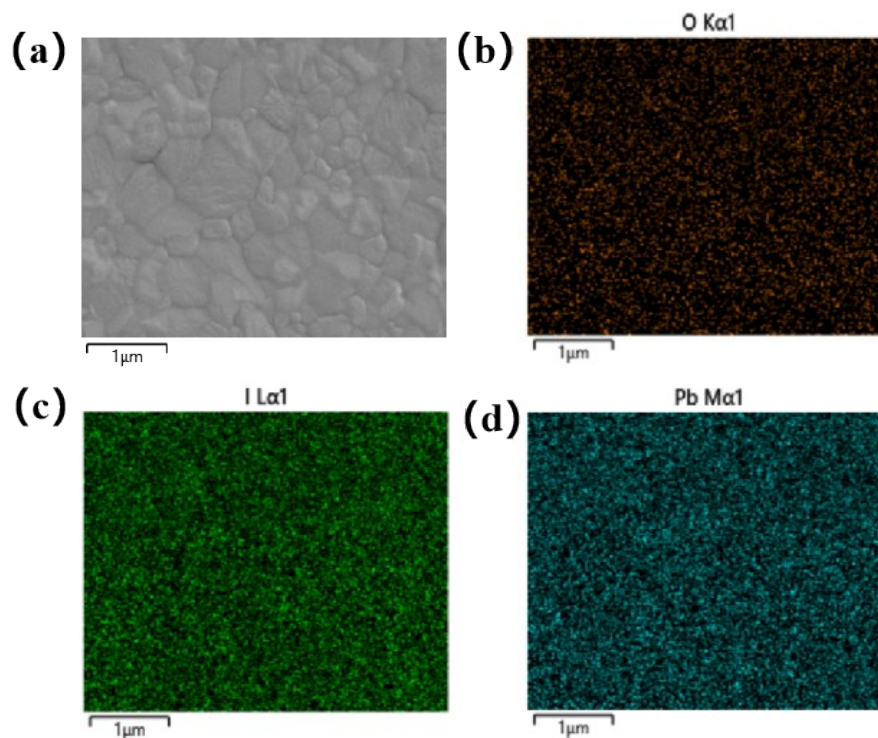

**Fig. S2** **a** SEM image of the Cs-0.05 PVK film. **b-d** Distribution plots of (b) I, (c) Pb, (d) Cs.

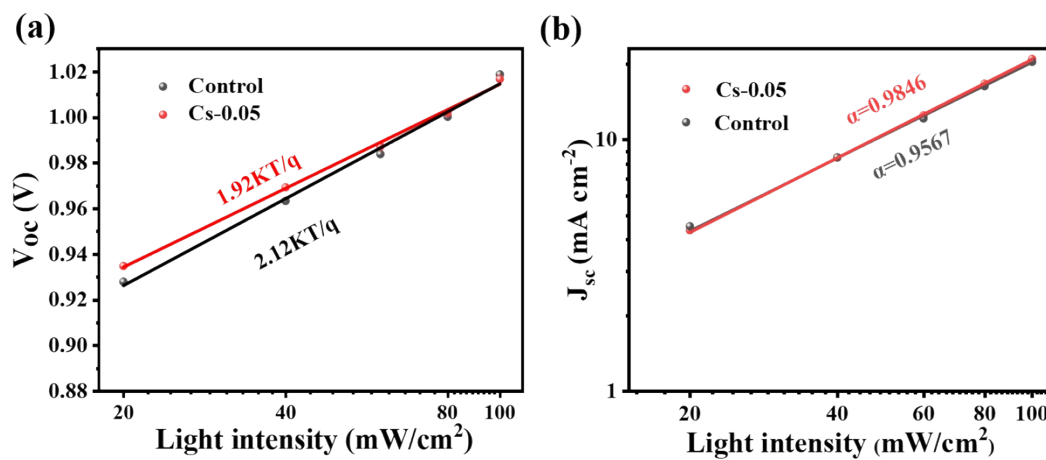

**Fig. S3** **a** Light Intensity Dependence of  $V_{oc}$ . **b** Light Intensity Dependence of  $J_{sc}$ .

**Table S1** The statistical parameters of time-resolved photoluminescence (TRPL) spectra fitted by a bi-exponential function.

| Sample  | $A_1$ | $A_2$ | $\tau_1(\text{ns})$ | $\tau_2(\text{ns})$ | $\tau_{\text{ave}}(\text{ns})$ |
|---------|-------|-------|---------------------|---------------------|--------------------------------|
| Control | 0.72  | 59.93 | 0.29                | 735.89              | 253.28                         |
| Cs-0.05 | 0.49  | 93.79 | 0.51                | 948.31              | 531.87                         |

**Table S2** Calculated parameters and trap density ( $N_t$ ) of control and Cs-0.05 devices.

| Sample  | L (nm) | $V_{\text{TFL}}$ (V) | $N_t(\text{cm}^{-3})$ |
|---------|--------|----------------------|-----------------------|
| Control | 500    | 0.90                 | $1.56 \times 10^{16}$ |
| Cs-0.05 | 500    | 0.78                 | $1.35 \times 10^{16}$ |

**Table S3** Fitting parameters of C-PSCs from Nyquist plots.

| <b>Sample</b>  | <b>R<sub>s</sub> (Ω)</b> | <b>R<sub>rec</sub> (Ω)</b> |
|----------------|--------------------------|----------------------------|
| <b>Control</b> | 28.2                     | 3087                       |
| <b>Cs-0.05</b> | 27.9                     | 4709                       |

**Table S4** Photovoltaic parameters of the best-performing control and Cs-0.05 devices measured under both reverse and forward voltage scans.

| <b>Sample</b>  | <b>V<sub>OC</sub> (V)</b> | <b>J<sub>SC</sub> (mA cm<sup>-2</sup>)</b> | <b>FF (%)</b> | <b>PCE (%)</b> |
|----------------|---------------------------|--------------------------------------------|---------------|----------------|
| <b>Control</b> | 1.002                     | 21.99                                      | 60.13         | 13.25          |
| <b>Cs-0.02</b> | 1.084                     | 21.92                                      | 71.86         | 16.04          |
| <b>Cs-0.05</b> | 1.042                     | 22.31                                      | 74.45         | 17.31          |
| <b>Cs-0.08</b> | 1.028                     | 22.18                                      | 70.21         | 16.01          |
| <b>Cs-0.1</b>  | 1.016                     | 21.91                                      | 69.55         | 15.47          |

**Table S5** Progress in the efficiency of carbon-based HTLperovskite solar cells.

| Device Structure                                                       | PVK                                                    | PCE    | Year |
|------------------------------------------------------------------------|--------------------------------------------------------|--------|------|
| FTO/TiO <sub>2</sub> /PVK/PI/C[1]                                      | MAPbI <sub>3</sub>                                     | 13.76% | 2023 |
| FTO/SnO <sub>2</sub> /PVK/Eu-TCPP MOF/C[2]                             | MAPbI <sub>3</sub>                                     | 18.13% | 2023 |
| ITO/SnO <sub>2</sub> /PVK/TFEP/C[3]                                    | MAPbI <sub>3</sub>                                     | 17.78% | 2023 |
| FTO/SnO <sub>2</sub> /PVK/TPCA/C[4]                                    | MAPbI <sub>3</sub>                                     | 13.64% | 2024 |
| FTO/SnO <sub>2</sub> /PVK /C(Mn <sub>3</sub> O <sub>4</sub> )[5]       | MAPbI <sub>3</sub>                                     | 19.03% | 2024 |
| FTO/SnO <sub>2</sub> /PVK(DMAHC <sub>2</sub> O <sub>4</sub> )/C[6]     | CsPbI <sub>3</sub>                                     | 18.48% | 2024 |
| FTO/SnO <sub>2</sub> /CsPbI <sub>2</sub> Br/NMB/C[7]                   | CsPbI <sub>2</sub> Br                                  | 14.15% | 2024 |
| FTO/SnO <sub>2</sub> /FAPbI <sub>3</sub> /MACI/C[8]                    | FAPbI <sub>3</sub>                                     | 20.31% | 2024 |
| FTO/TiO <sub>2</sub> /PVK/Metformin&HI/C[9]                            | MAPbI <sub>3</sub>                                     | 14.13% | 2024 |
| FTO/SnO <sub>2</sub> /PVK/TAI/C[10]                                    | FA <sub>0.83</sub> Cs <sub>0.17</sub> PbI <sub>3</sub> | 20.1%  | 2024 |
| FTO/CsPbBr <sub>3</sub> /TiO <sub>2</sub> /ZrO <sub>2</sub> /C[11]     | CsPbBr <sub>3</sub>                                    | 10.18% | 2025 |
| ITO/TiO <sub>2</sub> /Mg-SnO <sub>2</sub> /CsPbI <sub>2</sub> Br/C[12] | CsPbI <sub>2</sub> Br                                  | 17.42% | 2025 |
| FTO/SnO <sub>2</sub> /CsPbI <sub>3</sub> / Y(Ac) <sub>3</sub> /C[13]   | CsPbI <sub>3</sub>                                     | 15.53% | 2025 |
| FTO/SnO <sub>2</sub> /PVK/C[14]                                        | FA <sub>0.9</sub> Cs <sub>0.1</sub> PbI <sub>3</sub>   | 20.15% | 2026 |

## Reference

- [1] W.-W. Liu, C.-X. Li, C.-Y. Cui, G.-L. Liu, Y.-X. Lei, Y.-W. Zheng, S.-J. Da, Z.-Q. Xu, R. Zou, L.-B. Kong, F. Ran, Strengthened interfacial adhesive fracture energy by young's modulus matching degree strategy in carbon-based HTM free MAPbI<sub>3</sub> perovskite solar cell with enhanced mechanical compatibility, *Small* 20 (2024) 2304452. <https://doi.org/10.1002/sml.202304452>.
- [2] D. Wu, H. Zhou, X. Lai, X. Liu, K. Sang, Y. Chen, M. Chen, J. Wei, S. Wu, Q. Pang, L. Zhou, P. Chen, Eu-based porphyrin MOF enables high-performance carbon-based perovskite solar cells, *Small* 20 (2024) 2308783. <https://doi.org/10.1002/sml.202308783>.
- [3] K. Sang, D. Wu, S. Zhao, H. Zhou, J. Zhang, Z. Tong, F. Ding, Q. Pang, X. Zhang, L. Zhou, P. Chen, Ligand-induced In situ epitaxial growth of PbI<sub>2</sub> nanosheets/MAPbI<sub>3</sub> heterojunction realizes high-performance HTM-free carbon-based MAPbI<sub>3</sub> solar cells, *Small Methods* 8 (2024) 2301531. <https://doi.org/10.1002/smt.202301531>.
- [4] S.-J. Da, W.-W. Liu, C.-X. Li, Y.-X. Lei, F. Ran, Regulation of interface schottky barrier and photoelectric properties in carbon-based HTL-free perovskite solar cells, *Small* 21 (2025) 2408923. <https://doi.org/10.1002/sml.202408923>.
- [5] Y. Gou, J. Zhang, B. Jin, W. Dai, W. Zhang, C. Chen, L. Lin, X. Wang, Q. Tai, J. Li, Work function tuning of carbon electrode to boost the charge extraction in hole transport layer-free perovskite solar cells, *Small* (2024) 2403342. <https://doi.org/10.1002/sml.202403342>.

- [6] W. Wang, X. Peng, J. Zhang, J. Lin, R. Huang, G. Zhang, H. Guo, Z. Pan, X. Zhong, H. Rao, Dimethylamine oxalate manipulating CsPbI<sub>3</sub> perovskite film crystallization process for high efficiency carbon electrode based perovskite solar cells, *J. Energy Chem.* 93 (2024) 221–228. <https://doi.org/10.1016/j.jechem.2024.01.059>.
- [7] L. Gao, F. Liu, Y. Tu, R. Li, D. Jiang, Z. Du, J. Wu, Z. Lan, Enhancing the efficiency and stability of carbon-based perovskite solar cells through treatment of the CsPbI<sub>2</sub>Br surface with neostigmine bromide, *Chem. Eng. J.* 502 (2024) 158118. <https://doi.org/10.1016/j.cej.2024.158118>.
- [8] G. Huang, T. Zhang, W. Lin, L. Qin, S.-Z. Kang, X. Li, Achieving over 20 % efficiency in laminated HTM-free carbon electrode perovskite solar cells through In situ interface reconstruction, *Angew. Chem. Int. Ed.* 64 (2025) e202420687. <https://doi.org/10.1002/anie.202420687>.
- [9] H. Ran, W. Shao, Q. Qu, P. Qi, S. Wang, Y. Zhao, Y. Wang, Y. Tang, G. Fang, Localized transformation of 2D perovskite by protonated metformin for efficient carbon-based perovskite photovoltaic and photo-charging applications, *Adv. Funct. Mater.* 35 (2025) 2407860. <https://doi.org/10.1002/adfm.202407860>.
- [10] J. Tang, Y. Lin, H. Yan, J. Lin, H. Rao, Z. Pan, X. Zhong, 20.1 % certified efficiency of planar hole transport layer-free carbon-based perovskite solar cells by spacer cation chain length engineering of 2D perovskites, *Angew. Chem. Int. Ed.* 63 (2024) e202406167. <https://doi.org/10.1002/anie.202406167>.
- [11] W. Shao, J. Sheng, Y. Fu, J. He, Z. Deng, R. Cen, W. Wu, Achieving unprecedented power-output in 4-terminal mirror-symmetrical printable carbon CsPbBr<sub>3</sub> solar cells

through dual-solvent engineering, *Energy Environ. Sci.* 18 (2025) 3211–3222.

<https://doi.org/10.1039/D4EE05841K>.

[12] Z. Li, X. Xie, Z. Ai, Y. Han, T. Zhu, R. Ma, H. Liu, X. Lu, Q. Wei, M. Li, J. Xiao, K. Liu, Z. Ren, G. Li, Electron extraction optimization for carbon-based hole-conductor-free perovskite photovoltaics with record 1.41 V VOC, *Adv. Mater.* 37 (2025) 2502436.

<https://doi.org/10.1002/adma.202502436>.

[13] X. Ma, H. Tong, W. Li, H. Liu, X. Liu, G. Wan, Y. Li, Y. Fu, Z. Li, D. He, J. Li, Efficient and stable carbon-based hole-transport-layer-free CsPbI<sub>2</sub>Br solar cells by adding trace amounts of yttrium acetate into the photoactive layer, *Nano Lett.* 25 (2025) 8851–

8858. <https://doi.org/10.1021/acs.nanolett.5c00427>.

[14] Y. Lin, J. Lin, H. Yan, L. Liu, W. Cai, G. Zhang, H. Rao, X. Zhong, Z. Pan, Pre-nucleation chemical bath deposition of high-performance and reproducible SnO<sub>2</sub> electron transport layer for perovskite solar cells, *Adv. Funct. Mater.* 36 (2026) e12725.

<https://doi.org/10.1002/adfm.202512725>.
